# Supplementary material for: Gas-phase and solid-state electronic structure analysis and DFT benchmarking of HfCO
Source: Royal Society of Chemistry journal article supplement (doi:10.1039/d3cp03550f), 2023-01-01
Supplement: d3cp03550f1.pdf [file d3cp03550f1.pdf]

**Supplementary Material for**  
***Gas-Phase and Solid-State Electronic Structure Analysis and DFT Benchmarking of HfCO***

Isuru R. Ariyaratna<sup>1</sup>, Yeongsu Cho<sup>1</sup>, Chenru Duan<sup>1,2</sup>, and Heather J. Kulik<sup>1,2\*</sup>

<sup>1</sup>*Department of Chemical Engineering, Massachusetts Institute of Technology, Cambridge, MA 02139*

<sup>2</sup>*Department of Chemistry, Massachusetts Institute of Technology, Cambridge, MA 02139*  
\*email: [hjkulik@mit.edu](mailto:hjkulik@mit.edu), phone: 617-253-4584

**Contents**

|                                                                                   |          |
|-----------------------------------------------------------------------------------|----------|
| <b>Figure S1</b> Interaction of CO molecule with Hf surface                       | Page S2  |
| <b>Figure S2</b> vbL diagram for states of HfCO                                   | Page S2  |
| <b>Figure S3</b> Dissociation energy of HfCS with DFT                             | Page S3  |
| <b>Figure S4</b> Dissociation energy of HfCSe with DFT                            | Page S4  |
| <b>Table S1</b> Dissociation energy of HfCO with DFT                              | Page S5  |
| <b>Table S2</b> Dissociation energy of HfCS with DFT                              | Page S6  |
| <b>Table S3</b> Dissociation energy of HfCSe with DFT                             | Page S7  |
| <b>Figure S5</b> Dissociation energy of HfCX vs. dipole moment of the CX with DFT | Page S8  |
| <b>Table S4</b> Triplet-Quartet energy gap of HfCO with DFT                       | Page S9  |
| <b>Table S5</b> Ionization energy of HfCO with DFT                                | Page S10 |

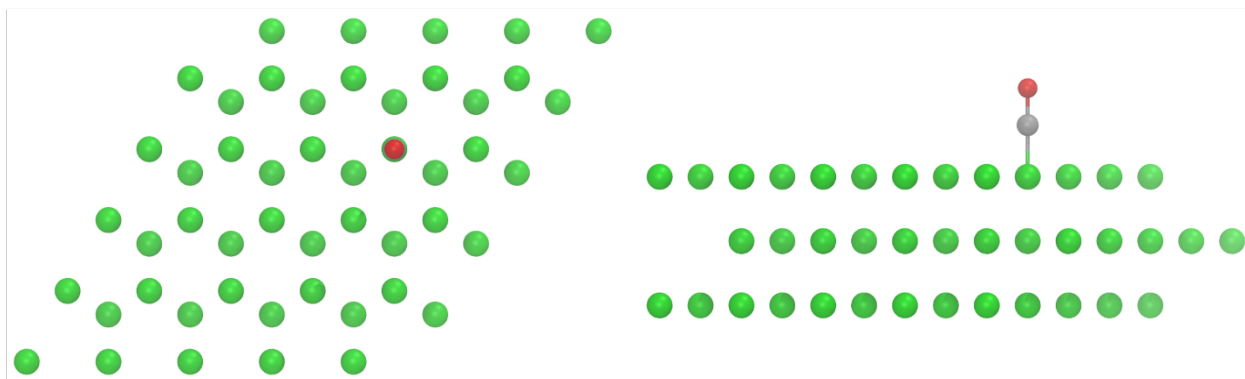

**Figure S1.** Geometry of CO molecule on periodic (001) surface of hexagonal Hf optimized with the BLYP functional. The C atom is 2.22 Å from the Hf surface and C-O bond length is 1.17 Å.

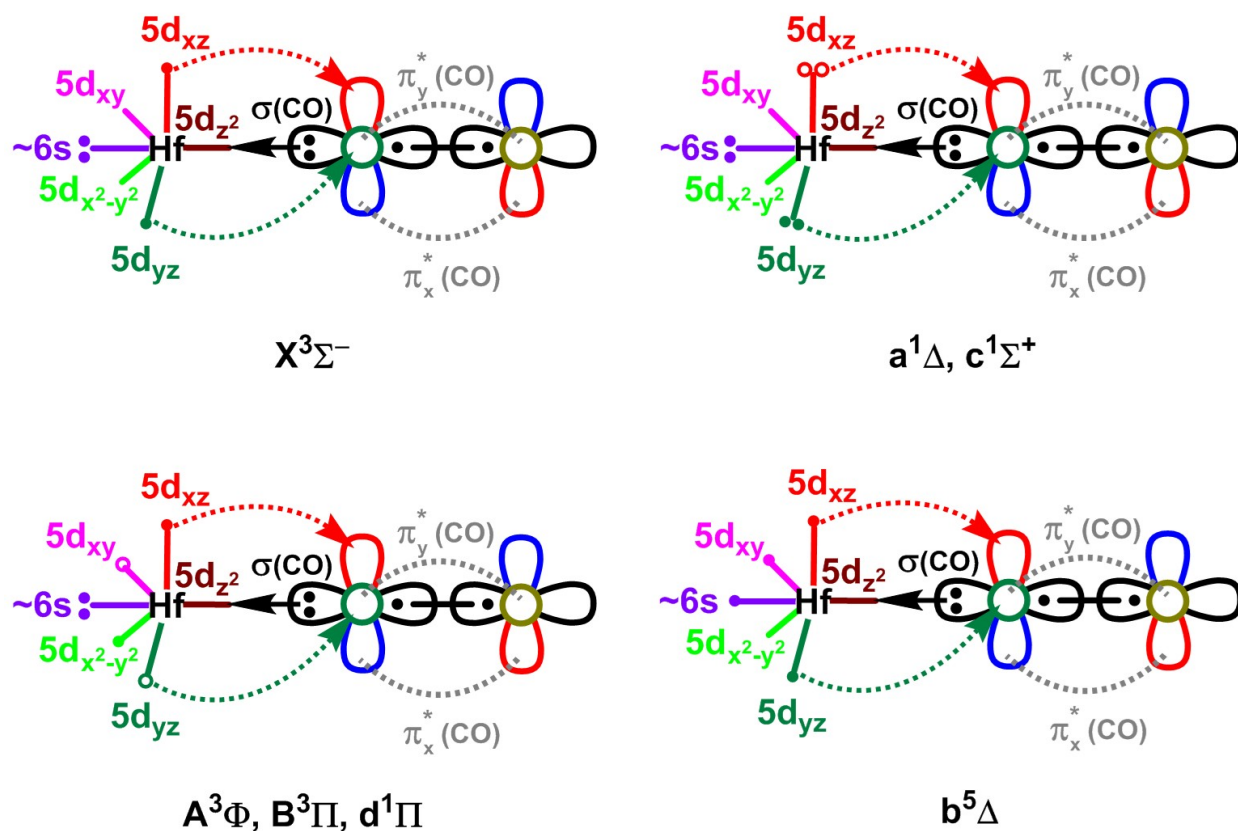

**Figure S2.** Proposed valence-bond-Lewis (vbl) diagrams for the seven lowest electronic states of HfCO. The  $\pi_x$  and  $\pi_y$  bonds of CO are omitted for clarity. The two  $5d_{xz}$  and  $5d_{yz}$  electrons of  $X^3\Sigma^-$  have the same spin. The multireference  $(1\pi_x)^2 \pm (1\pi_y)^2$  components of the  $a^1\Delta$  and  $c^1\Sigma^+$  states are shown by electron pairs with open and solid circles. Similarly, the  $\pi^1d^1$  electron combinations of  $A^3\Phi$ ,  $B^3\Pi$ , and  $d^1\Pi$  are depicted in open and solid circles. See main text Table 1 for more details on electronic configurations.

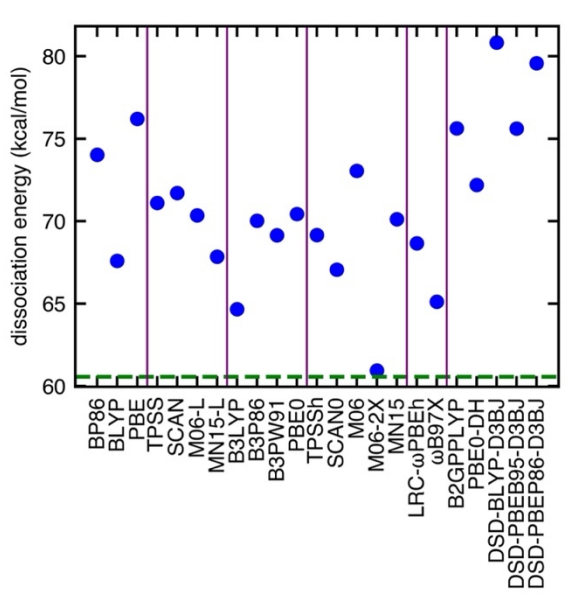

**Figure S3.** Dissociation energy ( $D_e$ , in kcal/mol) of HfCS calculated with different DFT functionals using the def2-QZVP basis set (blue dots). Each class of density functionals is separated with vertical purple lines and ordered by the rung on Jacob's ladder (left to right: GGA, meta-GGA, global GGA hybrid, meta-GGA hybrid, range-separated hybrid, and double hybrid). The horizontal green dashed line represents the CCSD(T)/TZ dissociation energy of HfCS.

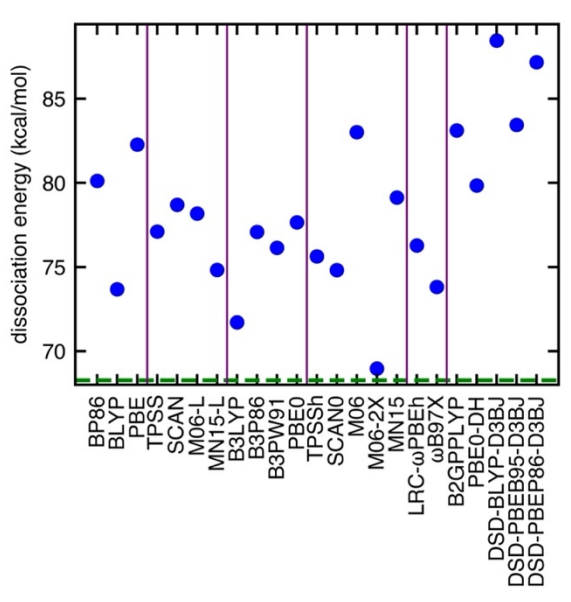

**Figure S4.** Dissociation energy ( $D_e$ , in kcal/mol) of HfCSe calculated with different DFT functionals using the def2-QZVP basis set (blue dots). Each class of density functionals is separated with vertical purple lines and ordered by the rung on Jacob's ladder (left to right: GGA, meta-GGA, global GGA hybrid, meta-GGA hybrid, range-separated hybrid, and double hybrid). The horizontal green dashed line represents the CCSD(T)/TZ dissociation energy of HfCSe.

**Table S1.** Dissociation energy ( $D_e$ ) of HfCO (kcal/mol) calculated with different DFT functionals using the def2-QZVP basis set and % DFT  $D_e$  error with respect to the CCSD(T)-A5Z  $D_e$  (29.96 kcal/mol).

|                        | DFT functional     | $D_e$ | % DFT error |
|------------------------|--------------------|-------|-------------|
| GGA                    | BP86               | 41.37 | 38.07       |
|                        | BLYP               | 35.02 | 16.87       |
|                        | PBE                | 43.19 | 44.17       |
| meta-GGA               | TPSS               | 38.59 | 28.81       |
|                        | SCAN               | 38.60 | 28.84       |
|                        | M06-L              | 37.07 | 23.74       |
|                        | MN15-L             | 36.95 | 23.34       |
| hybrid                 | B3LYP              | 31.07 | 3.72        |
|                        | B3P86              | 36.35 | 21.33       |
|                        | B3PW91             | 35.46 | 18.37       |
|                        | PBE0               | 36.35 | 21.34       |
| meta-GGA hybrid        | TPSSh              | 36.11 | 20.54       |
|                        | SCAN0              | 32.83 | 9.57        |
|                        | M06                | 38.38 | 28.11       |
|                        | M06-2X             | 27.62 | -7.81       |
|                        | MN15               | 38.56 | 28.72       |
| range-separated hybrid | LRC- $\omega$ PBEh | 35.24 | 17.62       |
|                        | $\omega$ B97X      | 30.24 | 0.95        |
| double hybrid          | B2GP-PLYP          | 40.61 | 35.53       |
|                        | PBE0-DH            | 37.39 | 24.81       |
|                        | DSD-BLYP-D3BJ      | 45.32 | 51.27       |
|                        | DSD-PBEB95-D3BJ    | 40.63 | 35.61       |
|                        | DSD-PBEP86-D3BJ    | 44.69 | 49.18       |

**Table S2.** Dissociation energy ( $D_e$ ) of HfCS (kcal/mol) calculated with different DFT functionals using the def2-QZVP basis set and % DFT  $D_e$  error with respect to the CCSD(T)-TZ  $D_e$  (60.58 kcal/mol).

|                        | DFT functional     | $D_e$ | % DFT error |
|------------------------|--------------------|-------|-------------|
| GGA                    | BP86               | 74.02 | 22.19       |
|                        | BLYP               | 67.60 | 11.59       |
|                        | PBE                | 76.20 | 25.79       |
| meta-GGA               | TPSS               | 71.11 | 17.38       |
|                        | SCAN               | 71.71 | 18.38       |
|                        | M06-L              | 70.35 | 16.13       |
|                        | MN15-L             | 67.85 | 12.01       |
| hybrid                 | B3LYP              | 64.66 | 6.74        |
|                        | B3P86              | 70.03 | 15.60       |
|                        | B3PW91             | 69.14 | 14.14       |
|                        | PBE0               | 70.43 | 16.26       |
| meta-GGA hybrid        | TPSSh              | 69.16 | 14.16       |
|                        | SCAN0              | 67.06 | 10.70       |
|                        | M06                | 73.05 | 20.59       |
|                        | M06-2X             | 60.95 | 0.61        |
|                        | MN15               | 70.13 | 15.76       |
| range-separated hybrid | LRC- $\omega$ PBEh | 68.66 | 13.34       |
|                        | $\omega$ B97X      | 65.12 | 7.49        |
| double hybrid          | B2GP-PLYP          | 75.63 | 24.84       |
|                        | PBE0-DH            | 72.20 | 19.18       |
|                        | DSD-BLYP-D3BJ      | 80.83 | 33.43       |
|                        | DSD-PBEB95-D3BJ    | 75.61 | 24.82       |
|                        | DSD-PBEP86-D3BJ    | 79.57 | 31.35       |

**Table S3.** Dissociation energy ( $D_e$ ) of HfCSe (kcal/mol) calculated with different DFT functionals using the def2-QZVP basis set and % DFT  $D_e$  error with respect to the CCSD(T)-TZ  $D_e$  (68.28 kcal/mol).

|                        | DFT functional     | $D_e$ | % DFT error |
|------------------------|--------------------|-------|-------------|
| GGA                    | BP86               | 80.12 | 17.34       |
|                        | BLYP               | 73.68 | 7.91        |
|                        | PBE                | 82.28 | 20.50       |
| meta-GGA               | TPSS               | 77.11 | 12.94       |
|                        | SCAN               | 78.70 | 15.26       |
|                        | M06-L              | 78.17 | 14.49       |
|                        | MN15-L             | 74.83 | 9.60        |
| hybrid                 | B3LYP              | 71.72 | 5.04        |
|                        | B3P86              | 77.09 | 12.90       |
|                        | B3PW91             | 76.15 | 11.53       |
|                        | PBE0               | 77.66 | 13.74       |
| meta-GGA hybrid        | TPSSh              | 75.64 | 10.78       |
|                        | SCAN0              | 74.82 | 9.57        |
|                        | M06                | 83.01 | 21.57       |
|                        | M06-2X             | 68.97 | 1.02        |
|                        | MN15               | 79.13 | 15.89       |
| range-separated hybrid | LRC- $\omega$ PBEh | 76.28 | 11.72       |
|                        | $\omega$ B97X      | 73.82 | 8.12        |
| double hybrid          | B2GP-PLYP          | 83.12 | 21.73       |
|                        | PBE0-DH            | 79.84 | 16.93       |
|                        | DSD-BLYP-D3BJ      | 88.46 | 29.55       |
|                        | DSD-PBEB95-D3BJ    | 83.45 | 22.22       |
|                        | DSD-PBEP86-D3BJ    | 87.17 | 27.67       |

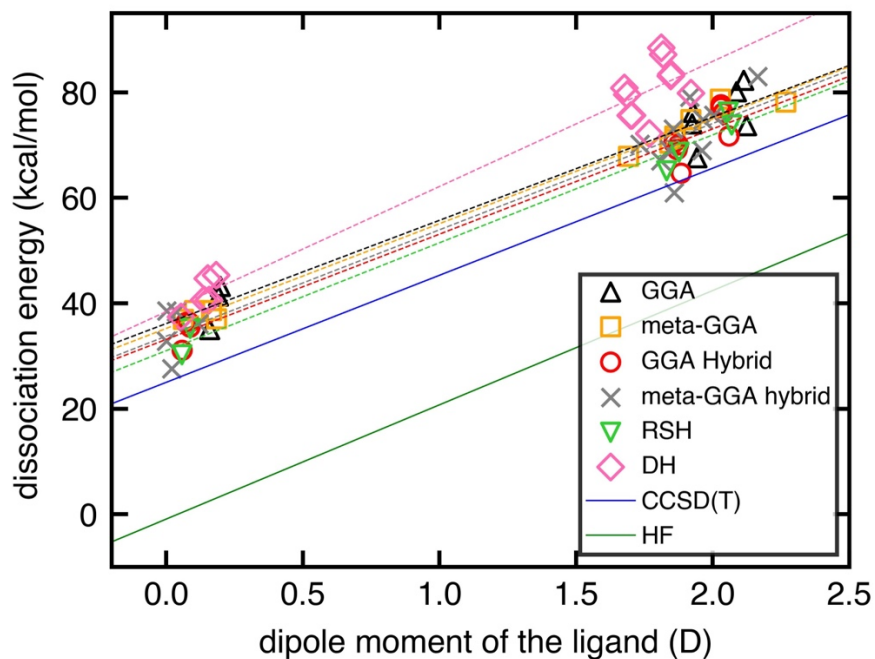

**Figure S5.** Dissociation energy ( $D_e$ , in kcal/mol) of  $\text{HfCX}$  vs. dipole moment ( $\mu$ , in D) of the CX for  $X = \text{O}, \text{S}, \text{Se}$  computed with different DFT functionals using the def2-QZVP basis set (trendlines of different functionals are depicted in dashed lines). The trendlines of HF/cc-pVTZ(-PP) and CCSD(T)/cc-pVTZ(-PP) are shown in green and blue solid lines with the  $y = 21.66x - 0.92$  ( $R^2 = 0.97$ ) and  $y = 20.30x + 25.01$  ( $R^2 = 0.99$ ) fittings, respectively. Trendlines of GGA, meta-GGA, GGA Hybrid, meta-GGA hybrid, RSH, and DH are  $y = 19.58x + 36.16$  ( $R^2 = 0.95$ ),  $y = 19.86x + 35.23$  ( $R^2 = 0.99$ ),  $y = 19.96x + 33.16$  ( $R^2 = 0.98$ ),  $y = 20.17x + 33.77$  ( $R^2 = 0.94$ ),  $y = 20.46x + 31.02$  ( $R^2 = 0.98$ ), and  $y = 23.73x + 38.42$  ( $R^2 = 0.96$ ), respectively.



**Table S4.** Triplet-Quintet energy gap ( $\Delta E_{T-Q}$ ) of HfCO (kcal/mol) calculated with different DFT functionals using the def2-QZVP basis set and % DFT  $\Delta E_{T-Q}$  error with respect to CCSD(T)-TZ  $\Delta E_{T-Q}$  (22.36 kcal/mol).

|                        | DFT functional     | $\Delta E_{T-Q}$ | % DFT error |
|------------------------|--------------------|------------------|-------------|
| GGA                    | BP86               | 12.74            | -43.02      |
|                        | BLYP               | 17.70            | -20.85      |
|                        | PBE                | 11.41            | -48.95      |
| meta-GGA               | TPSS               | 9.35             | -58.19      |
|                        | SCAN               | 4.46             | -80.06      |
|                        | M06-L              | 22.49            | 0.60        |
|                        | MN15-L             | 19.32            | -13.59      |
| hybrid                 | B3LYP              | 16.91            | -24.37      |
|                        | B3P86              | 12.85            | -42.55      |
|                        | B3PW91             | 9.61             | -57.03      |
|                        | PBE0               | 10.32            | -53.83      |
| meta-GGA hybrid        | TPSSh              | 9.43             | -57.83      |
|                        | SCAN0              | 5.81             | -74.03      |
|                        | M06                | 36.53            | 63.40       |
|                        | M06-2X             | 21.47            | -3.96       |
|                        | MN15               | 28.24            | 26.28       |
| range-separated hybrid | LRC- $\omega$ PBEh | 10.29            | -53.98      |
|                        | $\omega$ B97X      | 31.81            | 42.27       |
| double hybrid          | B2GP-PLYP          | 20.10            | -10.11      |
|                        | PBE0-DH            | 11.72            | -47.56      |
|                        | DSD-BLYP-D3BJ      | 21.07            | -5.76       |
|                        | DSD-PBEB95-D3BJ    | 21.97            | -1.73       |
|                        | DSD-PBEP86-D3BJ    | 20.71            | -7.36       |

**Table S5.** Adiabatic ionization energy (IE) of HfCO (eV) calculated with different DFT functionals using the def2-QZVP basis set and % DFT IE error with respect to CCSD(T)-TZ IE (6.974 eV).

|                        | DFT functional     | IE    | % DFT error |
|------------------------|--------------------|-------|-------------|
| GGA                    | BP86               | 7.146 | 2.47        |
|                        | BLYP               | 7.056 | 1.18        |
|                        | PBE                | 7.003 | 0.42        |
| meta-GGA               | TPSS               | 6.871 | -1.48       |
|                        | SCAN               | 6.813 | -2.31       |
|                        | M06-L              | 7.141 | 2.39        |
|                        | MN15-L             | 7.219 | 3.51        |
| hybrid                 | B3LYP              | 7.095 | 1.74        |
|                        | B3P86              | 7.169 | 2.79        |
|                        | B3PW91             | 6.879 | -1.36       |
|                        | PBE0               | 6.853 | -1.74       |
| meta-GGA hybrid        | TPSSh              | 6.832 | -2.04       |
|                        | SCAN0              | 6.760 | -3.06       |
|                        | M06                | 7.547 | 8.22        |
|                        | M06-2X             | 7.176 | 2.89        |
|                        | MN15               | 7.354 | 5.45        |
| range-separated hybrid | LRC- $\omega$ PBEh | 6.780 | -2.78       |
|                        | $\omega$ B97X      | 7.333 | 5.14        |
| double hybrid          | B2GP-PLYP          | 7.011 | 0.54        |
|                        | PBE0-DH            | 6.837 | -1.97       |
|                        | DSD-BLYP-D3BJ      | 7.023 | 0.70        |
|                        | DSD-PBEB95-D3BJ    | 6.941 | -0.48       |
|                        | DSD-PBEP86-D3BJ    | 7.025 | 0.74        |
